# Supplementary material for: Effects of chain extender on properties and foaming behavior of polypropylene foam
Source: Royal Society of Chemistry journal article supplement (doi:10.1039/c9ra04824c), 2019-01-01
Supplement: c9ra04824c1.pdf [file c9ra04824c1.pdf]

**Effects of chain extender on properties and foaming behavior of polypropylene foam**

Do Young Kim, Ji Hun Cha, and Kwan Ho Seo\*

Department of Polymer Science and Engineering, Kyungpook National University, Daegu,  
41566, Republic of Korea

\*Corresponding author E-mail: [khseo@knu.ac.kr](mailto:khseo@knu.ac.kr)

**Table S1.** Compositions of PP/GMA mixtures

| Sample | PP<br>(wt%) | GMA<br>(phr) | Phenolic<br>antioxidant<br>(phr) |
|--------|-------------|--------------|----------------------------------|
| 1      | 100         | 0            | 0.3                              |
| 2      | 100         | 0.5          | 0.3                              |
| 3      | 100         | 1.0          | 0.3                              |
| 4      | 100         | 1.5          | 0.3                              |
| 5      | 100         | 2.0          | 0.3                              |
| 6      | 100         | 2.5          | 0.3                              |
| 7      | 100         | 3.0          | 0.3                              |

**Table S2.**  $\Delta$ MFI of PP, grafted PP, and modified PP

| Sample | $\Delta$ MFI |
|--------|--------------|
| PP     | 11.6         |
| GPP    | 21.8         |
| MPP0.5 | 11.4         |
| MPP1.0 | 9.8          |
| MPP1.5 | 4.5          |
| MPP2.0 | 3.8          |

$$\Delta\text{MFI} = \text{MFI } 240\text{ }^\circ\text{C} - \text{MFI } 200\text{ }^\circ\text{C}$$

**Table S3.** Effect of AA content on thermal stability of modified PP

| Description | T <sub>d,5</sub><br>(°C) | T <sub>d,10</sub><br>(°C) | T <sub>d,max</sub><br>(°C) |
|-------------|--------------------------|---------------------------|----------------------------|
| PP          | 339.3                    | 355.3                     | 425.6                      |
| GPP         | 331.5                    | 352.9                     | 432.3                      |
| MPP0.5      | 341.5                    | 360.0                     | 433.2                      |
| MPP1.0      | 342.5                    | 361.6                     | 432.9                      |
| MPP1.5      | 346.7                    | 366.7                     | 434.4                      |
| MPP2.0      | 347.2                    | 367.1                     | 433.5                      |

**Table S4.** DSC data for PP, grafted PP, and modified PP samples

| Sample | T <sub>c</sub><br>(°C) | T <sub>m</sub><br>(°C) | ΔH <sub>f</sub><br>(°C) | X <sub>c</sub><br>(°C) |
|--------|------------------------|------------------------|-------------------------|------------------------|
| PP     | 121.0                  | 165.2                  | 137.0                   | 65.6                   |
| GPP    | 127.4                  | 164.8                  | 119.8                   | 57.3                   |
| MPP0.5 | 134.6                  | 165.2                  | 115.6                   | 55.3                   |
| MPP1.0 | 134.8                  | 165.8                  | 111.3                   | 53.3                   |
| MPP1.5 | 135.4                  | 165.2                  | 108.9                   | 52.1                   |
| MPP2.0 | 135.9                  | 165.3                  | 109.4                   | 52.3                   |

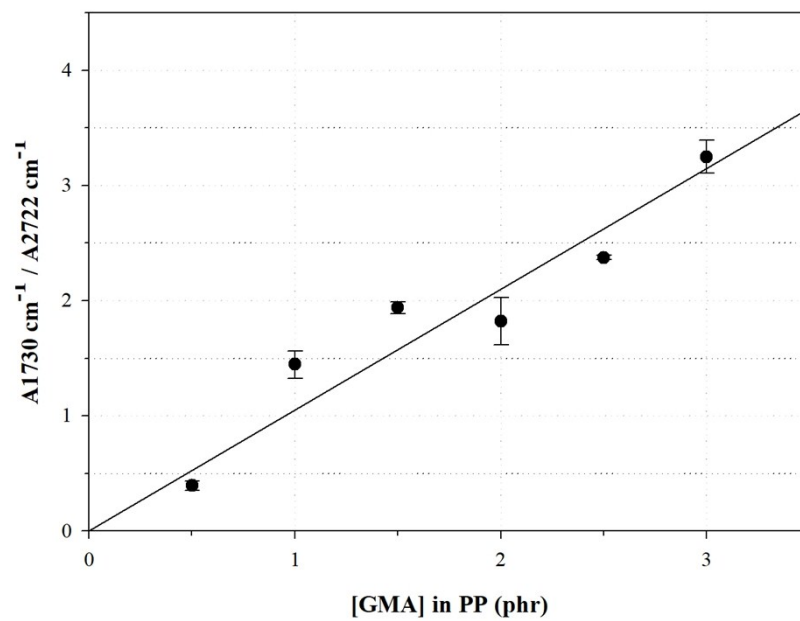

**Figure S1.** IR calibration curve for determining the amount of GMA grafted onto PP

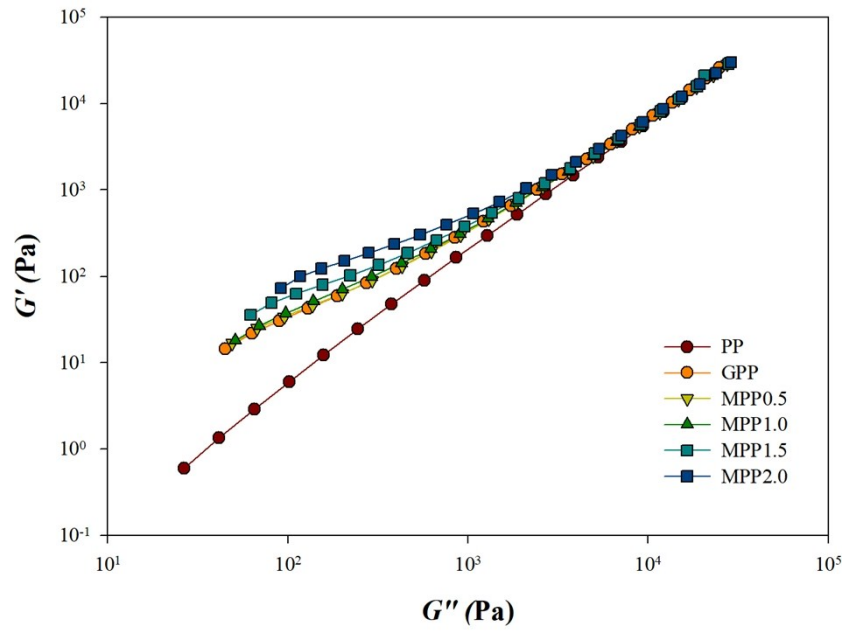

**Figure S2** Cole–Cole plot analysis for PP, grafted PP, and modified PP samples.

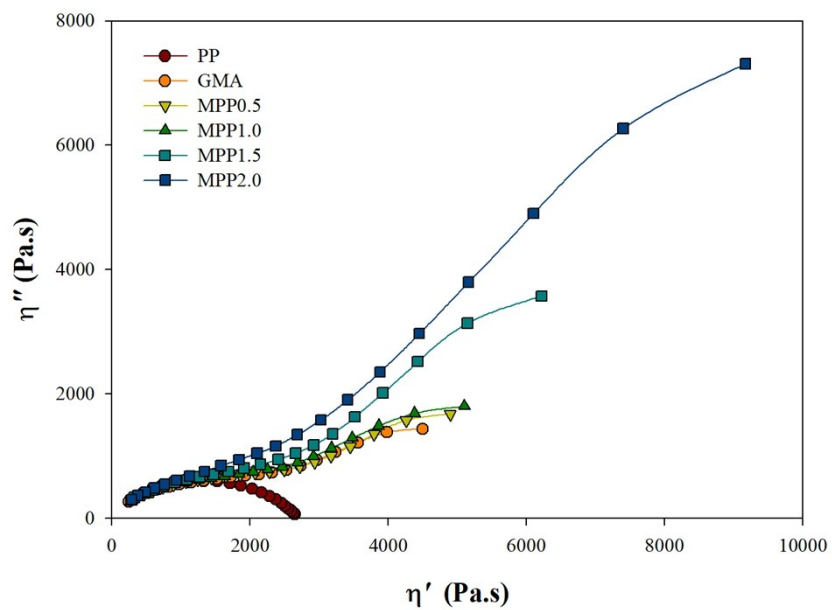

**Figure S3.** Han plot analysis for PP, grafted PP, and modified PP samples.



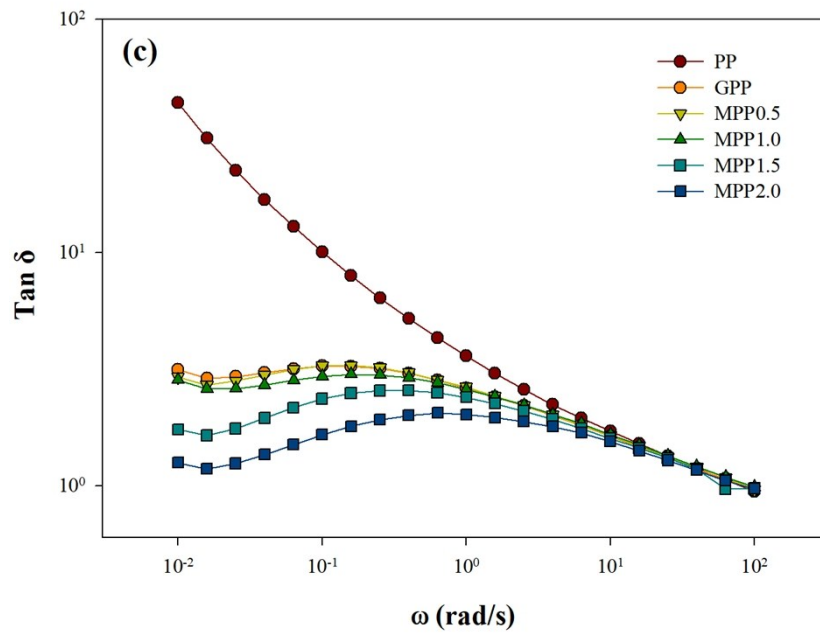

**Figure S4.** Loss factor analysis ( $\tan \delta$ ) of PP, grafted PP, and modified PP samples.

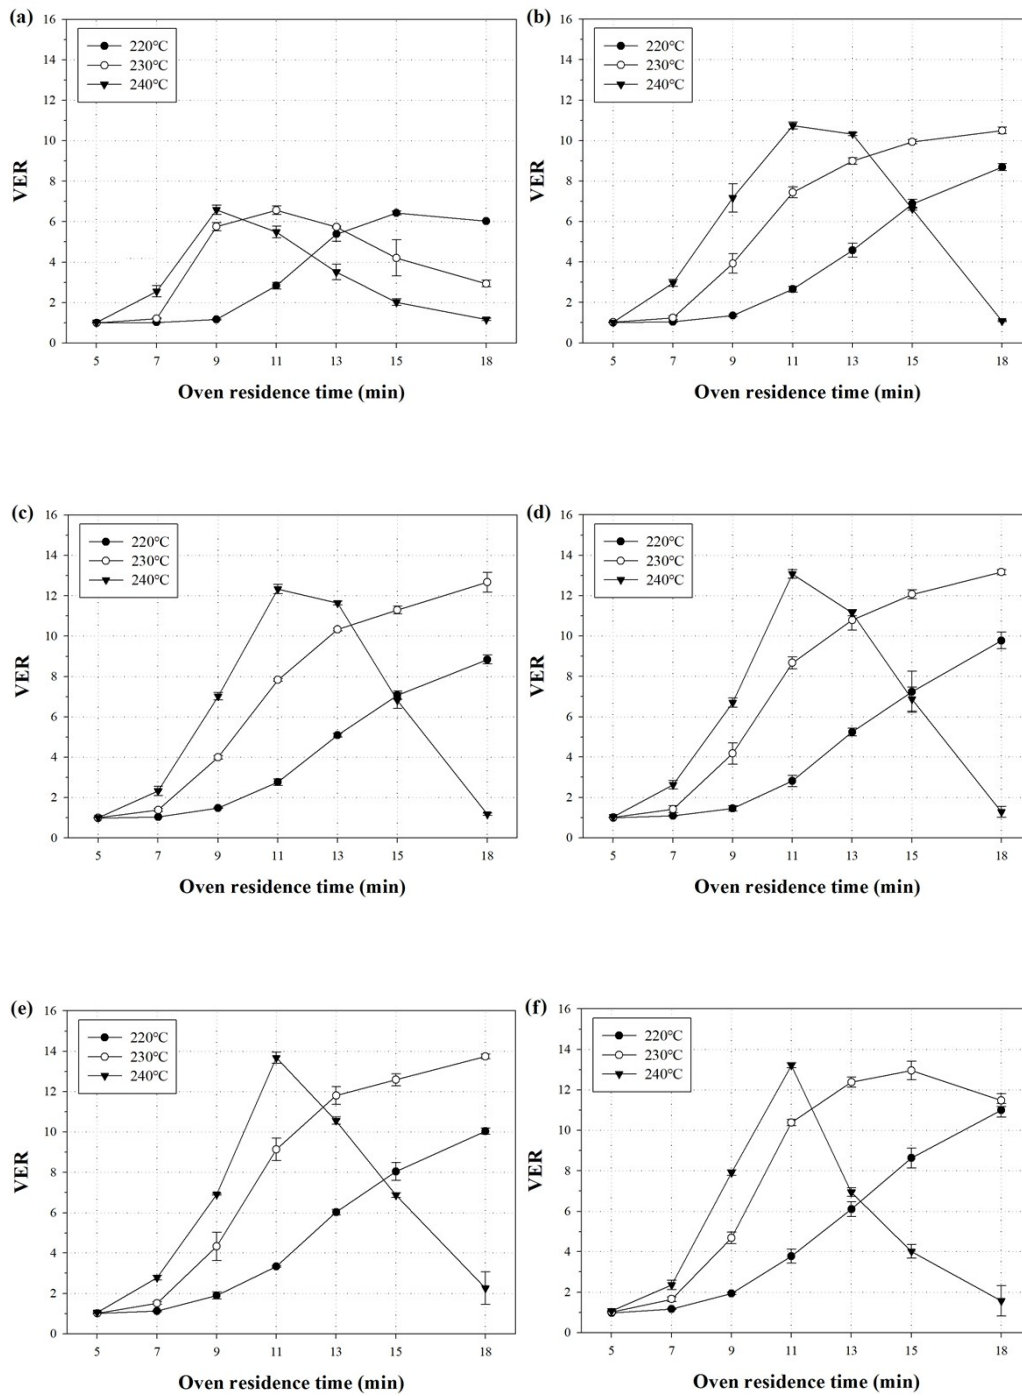

**Figure S5.** Variation of VER with ORTs for modified PP foams with various AA contents at different temperatures: (a) PP, (b) GPP, (c) MPP0.5, (d) MPP1.0, (e) MPP1.5, and (f) MPP2.0.
